# Supplementary material for: Heterotypic immunity against vaccinia virus in an HLA-B*07:02 transgenic mousepox infection model
Source: PubMed Central journal article supplement (PMC7406653; doi:10.1038/s41598-020-69897-w), 2020-08-05
Supplement: 41598_2020_69897_MOESM1_ESM.pdf [file 41598_2020_69897_MOESM1_ESM.pdf]

## SUPPLEMENTRY MATERIALS

# **Heterotypic immunity against vaccinia virus in an HLA-B\*07:02 transgenic mousepox infection model**

**Running title: Ectromelia virus-derived CD8<sup>+</sup> T cell epitopes**

Amrendra Kumar<sup>1,2</sup>, Naveen Chandra Suryadevara<sup>1,2</sup>, Kyle J. Wolf<sup>4</sup>, John T.

Wilson<sup>3</sup>, Richard J. DiPaolo<sup>4</sup>, James D. Brien<sup>4</sup>, & Sebastian Joyce<sup>1,2,5</sup>

<sup>1</sup>Department of Veterans Affairs, Tennessee Valley Healthcare System; <sup>2</sup>Department of Pathology, Microbiology & Immunology, Vanderbilt University Medical Centre;

<sup>3</sup>Department of Chemical & Biomolecular Engineering, Vanderbilt University; Nashville, Tennessee; <sup>4</sup>Department of Molecular Microbiology & Immunology, Saint Louis University School of Medicine, St. Louis, Missouri.

<sup>5</sup>Corresponding author: Sebastian Joyce, Ph.D., [sebastian.joyce@vumc.org](mailto:sebastian.joyce@vumc.org)

**TABLE S1: Properties of peptides chosen to generate binary encoded pB7.2 tetramers**

|    | ORF/self <sup>a</sup>                | VACV <sup>b</sup> | ECTV <sup>c</sup> | Source <sup>d</sup> | pB7.2 monomer exchange, % <sup>e</sup> |
|----|--------------------------------------|-------------------|-------------------|---------------------|----------------------------------------|
| 1  | A24R <sub>1002-1010</sub>            | KPYASKVFF         | •                 | MS                  | 70.83053                               |
| 2  | A34R <sub>82-90</sub>                | LPRPDTRHL         | •                 | MS                  | 81.74804                               |
| 3  | A3L <sub>192-200</sub>               | SPSNHHILL         | •                 | MS                  | 74.94446                               |
| 4  | A47L <sub>227-236</sub>              | KPVSDLYTSM        | •                 | MS                  | 56.64893                               |
| 5  | A4L <sub>126-135</sub>               | APASSLLPAL        | NSH               | MS                  | 76.23163                               |
| 6  | B17L <sub>181-190</sub>              | APYPGNVLVY        | •                 | MS                  | 82.74924                               |
| 7  | B18R <sub>305-313</sub>              | RPADSITYL         | <b>HPS</b> DSITYL | MS                  | 94.84093                               |
| 8  | B18R <sub>305-313</sub> <sup>f</sup> | RPLDSITYL         | <b>HPS</b> DSITYL | MS                  | 83.9946                                |
| 9  | B8R <sub>70-78</sub>                 | FPKNDFVSF         | <b>FPN</b> NDFVSF | MS                  | 94.85919                               |
| 10 | C10L <sub>41-49</sub>                | LPMEDNSDI         | •                 | MS                  | 46.47672                               |
| 11 | D11L <sub>506-514</sub>              | MPTVDEDLF         | •                 | MS                  | 58.24184                               |
| 12 | D5R <sub>375-383</sub>               | LPKEYSSEL         | •                 | MS                  | 74.42226                               |
| 13 | D9R <sub>26-35</sub>                 | IPRSKDTTHVF       | •                 | MS                  | 84.6781                                |
| 14 | E1L <sub>10-18</sub>                 | LPNITLKII         | •                 | MS                  | 25.29541                               |
| 15 | E2L <sub>216-224</sub>               | RPRDAIRFL         | •                 | MS                  | 71.43947                               |
| 16 | E9L <sub>175-183</sub>               | FPSVFINPI         | •                 | MS                  | 57.55645                               |
| 17 | E9L <sub>175-183</sub> <sup>f</sup>  | FPSVFINPV         | FPSVFINP <b>I</b> | MS                  | 73.84057                               |
| 18 | E9L <sub>526-534</sub>               | FPYEGGKVF         | •                 | MS                  | 111.9869                               |

|    |                                     |             |                         |           |          |
|----|-------------------------------------|-------------|-------------------------|-----------|----------|
| 19 | G5R <sub>341-349</sub>              | LPCQLMYAL   | •                       | MS        | 70.8617  |
| 20 | G7L <sub>175-183</sub>              | LPMIIGEPI   | •                       | MS        | 70.068   |
| 21 | H1L <sub>65-73</sub>                | LPNSNINII   | •                       | MS        | 59.41963 |
| 22 | H5R <sub>89-97</sub>                | SPSPGVGDI   | NSH                     | MS        | 54.39731 |
| 23 | I1L <sub>53-62</sub>                | IPVDLVKSSF  | •                       | MS        | 46.01204 |
| 24 | I4L <sub>498-507</sub>              | RPIGIGVQGL  | •                       | MS        | 70.52276 |
| 25 | I6L <sub>237-245</sub>              | FPTNTLTSI   | •                       | MS        | 57.23258 |
| 26 | I6L <sub>272-280</sub>              | IPKKIVSLL   | •                       | MS        | 56.66139 |
| 27 | I7L <sub>342-350</sub>              | TPPKSFKSL   | •                       | MS        | 57.33455 |
| 28 | J3R <sub>8-16</sub>                 | KPFMYFEEI   | •                       | MS        | 42.75962 |
| 29 | K1L <sub>151-159</sub>              | IPSTFDLAI   | •                       | MS        | 48.3324  |
| 30 | K6L <sub>17-25</sub>                | KPITYPKAL   | •                       | MS        | 78.04875 |
| 31 | L4R <sub>37-45</sub>                | FPRSMLSIF   | •                       | MS        | 40.13252 |
| 32 | N2L <sub>104-113</sub>              | RPNQHHTIDL  | RPN <del>K</del> HHTIDL | MS        | 86.15705 |
| 33 | I4L <sub>670-678</sub>              | LPEDIKRVY   | •                       | MS        | 46.96676 |
| 34 | D13L <sub>160-168</sub>             | TPFDVEDTF   | •                       | MS        | 52.06957 |
| 35 | TA25R <sub>954-962</sub>            | FPSSNETSI   | •                       | MS        | 49.48632 |
| 36 | D1R <sub>808-817</sub>              | RPSTRNFFEL  | •                       | MS        | 70.72724 |
| 37 | B15R <sub>91-101</sub>              | IPDEQKTIIGL | •                       | Predicted | 76.69625 |
| 38 | O1L <sub>549-557</sub>              | IPITDSLSF   | •                       | Public    | 64.66695 |
| 39 | O1L <sub>549-557</sub> <sup>f</sup> | IPITESLSF   | IPIT <del>D</del> SLSF  | Public    | 58.66162 |

|    |                                 |             |                                       |        |           |
|----|---------------------------------|-------------|---------------------------------------|--------|-----------|
| 40 | B22R <sub>72-80</sub>           | TVADVRRHCL  | SID <sup>D</sup> VRRQ <sup>C</sup> CL | Public | 79.57025  |
| 41 | C1L <sub>102-111</sub>          | KPKPAVRFAI  | EY <sup>N</sup> RAVRFAE               | Public | 75.30461  |
| 42 | D1R <sub>686-694</sub>          | HPRHYATVM   | •                                     | Public | 71.18591  |
| 43 | F4L <sub>6-14</sub>             | APNPNRFVI   | •                                     | Public | 98.25802  |
| 44 | J6R <sub>303-311</sub>          | MPAYIRNTL   | •                                     | Public | 86.58602  |
| 45 | O1L <sub>335-344</sub>          | RPMSLRSTII  | RP <sup>I</sup> SLRSTII               | Public | 74.84205  |
| 46 | J2R <sub>116-124</sub>          | KPFNNILNL   | •                                     | Public | 56.809954 |
| 47 | TTF2 <sub>333-341</sub>         | APAAPGLSL   | na                                    | Self   | 76.23394  |
| 48 | HNRPM <sub>499-507</sub>        | APIDRVGQTL  | na                                    | Self   | 72.42752  |
| 49 | SAP145 <sub>18-27</sub>         | APIQGNREEL  | na                                    | Self   | 69.33693  |
| 50 | HK2 <sub>904-912</sub>          | APKCDVSFL   | na                                    | Self   | 59.89381  |
| 51 | CUL-4A <sub>5-14</sub>          | APRKGSFSAL  | na                                    | Self   | 95.3412   |
| 52 | ABCC12 <sub>1347-1353</sub>     | APSAFGMLL   | na                                    | Self   | 67.52423  |
| 53 | NLRP2 <sub>213-220</sub>        | GPSGLGKTAI  | na                                    | Self   | 60.51939  |
| 54 | TRIM27 <sub>468-476</sub>       | GPVRPYFSL   | na                                    | Self   | 78.9362   |
| 55 | FASN <sub>1169-1178</sub>       | I PRDPSQQEL | na                                    | Self   | 77.31273  |
| 56 | CDCA7 <sub>94-103</sub>         | KPRPDVTNEL  | na                                    | Self   | 77.95413  |
| 57 | hCG1980884 <sub>1807-1815</sub> | KPYFPPRIL   | na                                    | Self   | 62.56214  |
| 58 | FASN <sub>925-933</sub>         | LPKTGTVSL   | na                                    | Self   | 74.5599   |
| 59 | RACGAP1 <sub>465-473</sub>      | LPQANRDTL   | na                                    | Self   | 100.5323  |
| 60 | COPS8 <sub>163-172</sub>        | LPRKPVAGAL  | na                                    | Self   | 99.14703  |

|    |                              |             |    |      |          |
|----|------------------------------|-------------|----|------|----------|
| 61 | PACSIN2 <sub>337-345</sub>   | LPSKPSSTL   | na | Self | 66.27471 |
| 62 | FUS/BBF2H7 <sub>91-100</sub> | LPVSVCTPGPL | na | Self | 56.58131 |
| 63 | TYMS <sub>274-282</sub>      | RPFPKLRIL   | na | Self | 64.86887 |
| 64 | VEGFR3 <sub>1050-1058</sub>  | RPGSSDRVL   | na | Self | 86.67953 |
| 65 | UROD <sub>163-171</sub>      | RPQASHQLL   | na | Self | 65.97249 |
| 66 | HECTD1439-447                | RPQVAKTLL   | na | Self | 105.5192 |
| 67 | SIK1 <sub>430-447</sub>      | RPRPVSPSSL  | na | Self | 78.38857 |
| 68 | TBX1 <sub>442-450</sub>      | RPSPPNPEL   | na | Self | 74.64187 |
| 69 | LOC399706 <sub>139-145</sub> | SPAGSTRVL   | na | Self | 82.34095 |
| 70 | SLC37A3 <sub>377-386</sub>   | SPNDKSINAL  | na | Self | 79.91597 |
| 71 | CA9 <sub>397-406</sub>       | SPRAAEPVQL  | na | Self | 83.77609 |
| 72 | KCDT10 <sub>28-36</sub>      | SPSSKYVKL   | na | Self | 89.20886 |
| 73 | TNKS <sub>142-150</sub>      | SPSSPGSSL   | na | Self | 78.06154 |
| 74 | MAP1S <sub>945-954</sub>     | SPVYLDLAYL  | na | Self | 42.82756 |
| 75 | HRT3 <sub>162-170</sub>      | TPSNTPTGPL  | na | Self | 52.25194 |

<sup>a</sup>Open reading frames (ORFs)/source molecules and location of epitopes defined based on Copenhagen reference strain (VACCC, txid 10249), homo sapiens (NCBITaxon:9606)

<sup>b</sup>amino acid sequence based on Copenhagen reference strain (VACCC, ID 10249)

<sup>c</sup>Amino acid changes in the orthologous ECTV peptide; ●, conserved sequences with 100% homology; NSH, no significant homology; red bold residues, variation in ECTV within the VACV-derived epitope; based on Netblast (blastcl3: www.ncbi.nlm.nih.gov) using ECTV txid12643; na, not applicable

---

<sup>d</sup>MS, mass spectrometry discovered VACV peptides discovered by us<sup>1</sup>, predicted, reported as predicted VACV epitope; public, reported as positive in human or HLA class I transgenic mouse CD8<sup>+</sup> T cell assay; self, naturally processed self peptides<sup>2</sup>

<sup>e</sup>Average rescue of pB7.2 monomer assessed in an UV-mediated peptide exchange assay<sup>1</sup>; see Materials and Methods and Figure 5C; a threshold of  $\geq 40\%$  exchange was used to select peptides for tetramer binding study

<sup>f</sup>VARV orthologue, txid 10255 variola virus

---

**Table S2: Homology of VACV epitopes uniquely recognised by ECTV-reactive CD8<sup>+</sup> T cells**

**Orf: I6L<sup>a,b</sup>; epitope: I6L<sub>272–281</sub>**

|      |     |                                                                                |     |
|------|-----|--------------------------------------------------------------------------------|-----|
| ECTV | 1   | MNNFVKQVASKSLKPTKKLSPSDE <b>V</b> ISLNECIISFNLDNFYYCNDGLFTKPINTPEDVLK          | 60  |
|      |     | MNNFVKQVASKSLKPTKKLSPSDE ISLNECIISFNLDNFYYCNDGLFTKPINTPEDVLK                   |     |
| VACV | 1   | MNNFVKQVASKSLKPTKKLSPSDE <b>A</b> ISLNECIISFNLDNFYYCNDGLFTKPINTPEDVLK          | 60  |
| ECTV | 61  | SLL <b>I</b> MESFAYEKMIKGLIKILISRAYINDIYFTPPFGWLTGV <b>D</b> DPETHVVIKIIFNSSL  | 120 |
|      |     | SLL <b>+</b> MESFAYEKMIKGLIKILISRAYINDIYFTPPFGWLTGV DPETHVVIKIIFNSSL           |     |
| VACV | 61  | SLL <b>V</b> MESFAYEKMIKGLIKILISRAYINDIYFTPPFGWLTGV <b>D</b> DPETHVVIKIIFNSSL  | 120 |
| ECTV | 121 | ISIKSQVIEYLPYNNVNLVLTTEKELSINTFNVPSIPMSIISFFPFDTDFILVILFF                      | 180 |
|      |     | ISIKSQVIEYLPYNNVNLVLTTEKELSINTFNVPSIPMSIISFFPFDTDFILVILFF                      |     |
| VACV | 121 | ISIKSQVIEYLPYNNVNLVLTTEKELSINTFNVPSIPMSIISFFPFDTDFILVILFF                      | 180 |
| ECTV | 181 | GVYNDSYCGISYISPKERLPYIIIEILKPLVSEINMLSDEIGRTSSIRIFNSTSVKKFPTN                  | 240 |
|      |     | GVYNDSYCGISYISPKERLPYIIIEILKPLVSEINMLSDEIGRTSSIRIFNSTSVKKFPTN                  |     |
| VACV | 181 | GVYNDSYCGISYISPKERLPYIIIEILKPLVSEINMLSDEIGRTSSIRIFNSTSVKKFPTN                  | 240 |
| ECTV | 241 | TLTSICEIVYSFDES <b>S</b> FPTPKTFTPLNASPY <b>IPKKIVSLL</b> DLPSNVEIKAISRGGVDFIT | 300 |
|      |     | TLTSICEIVYSFDES FPTPKTFTPLNASPY <b>IPKKIVSLL</b> DLPSNVEIKAISRGGVDFIT          |     |
| VACV | 241 | TLTSICEIVYSFDES <b>F</b> FPTPKTFTPLNASPY <b>IPKKIVSLL</b> DLPSNVEIKAISRGGVDFIT | 300 |
| ECTV | 301 | HINNKRL <b>N</b> TILVIAKDNFLKNSTFSGTFIKENIWKGIYTYRIKSSFPVPTIKSVTNKK            | 360 |
|      |     | HINNKRL TILVIAKDNFLKNSTFSGTFIKENIWKGIYTYRIKSSFPVPTIKSVTNKK                     |     |
| VACV | 301 | HINNKRL <b>T</b> TILVIAKDNFLKNSTFSGTFIKENIWKGIYTYRIKSSFPVPTIKSVTNKK            | 360 |
| ECTV | 361 | KICKKHCFVNSQYTTRTLSHIL                                                         | 382 |
|      |     | KICKKHCFVNSQYTTRTLSHIL                                                         |     |
| VACV | 361 | KICKKHCFVNSQYTTRTLSHIL                                                         | 382 |

**Orf: B15R<sup>a,b</sup>; epitope: B15R<sub>91-101</sub> (C8R in ECTV)**

|      |     |                                                                                          |     |
|------|-----|------------------------------------------------------------------------------------------|-----|
| ECTV | 1   | MTANFSTHVFSPQHCGCDRLTSID <b>DV</b> RQCLTEYIYWSSYAYRNRQCAGQLYSTLLSFRDD                    | 75  |
|      |     | MTANFSTHVFSPQHCGCDRLTSID <b>+</b> QCLTEYIYWSSYAYRNRQCAGQLYSTLLSFRDD                      |     |
| VACV | 1   | MTANFSTHVFSPQHCGCDRLTSID <b>V</b> KQCLTEYIYWSSYAYRNRQCAGQLYSTLLSFRDD                     | 60  |
| ECTV | 76  | AE <b>S</b> VFIDIRELVKNMPWDDVKDC <b>AE</b> IIRCY <b>IPDEQKTIREISSI</b> IIGLCAYAATYWGGEDH | 135 |
|      |     | AE VFIDIRELVKNMPWDDVKDC EIIRCY <b>IPDEQKTIREIS+</b> IIGLCAYAATYWGGEDH                    |     |
| VACV | 61  | AE <b>L</b> VFIDIRELVKNMPWDDVKDC <b>TE</b> IIRCY <b>IPDEQKTIREISAI</b> IIGLCAYAATYWGGEDH | 120 |
| ECTV | 136 | PTSNSLNALFVMLE <b>L</b> LNVDYNIIFRRMN                                                    | 164 |
|      |     | PTSNSLNALFVMLE <b>+</b> LNVDYNIIFRRMN                                                    |     |
| VACV | 121 | PTSNSLNALFVMLE <b>M</b> LNVDYNIIFRRMN                                                    | 149 |

**Note IREISS insertion at position 91 in ECTV<sup>b</sup> but lacking in this strain of VACV<sup>c</sup>**

|      |   |                                                                       |    |
|------|---|-----------------------------------------------------------------------|----|
| ECTV | 1 | MTANFSTHVFSPQHCGCDRLTSID <b>DV</b> RQCLTEYIYWSSYAYRNRQCAGQLYSTLLSFRDD | 75 |
|      |   | MTANFSTHVFSPQHCGCDRLTSID <b>+</b> QCLTEYIYWSSYAYRNRQCAGQLYSTLLSFRDD   |    |
| VACV | 1 | MTANFSTHVFSPQHCGCDRLTSID <b>V</b> KQCLTEYIYWSSYAYRNRQCAGQLYSTLLSFRDD  | 60 |

---

|      |     |                                                                                |     |
|------|-----|--------------------------------------------------------------------------------|-----|
| ECTV | 76  | AE <b>S</b> VFIDIRELVKNMPWDDVKDCAEIIRCY <b>IPDEQKTIREISSIIGL</b> CAYAATYWGGEDH | 135 |
|      |     | AE VFIDIRELVKNMPWDDVKDC EIIRCY <b>IPDEQKT</b> <b>IIGL</b> CAYAATYWGGEDH        |     |
| VACV | 61  | AEL <b>V</b> VFIDIRELVKNMPWDDVKDCVEIIRCY <b>IPDEQKT-----IIGL</b> CAYAATYWGGEDH | 114 |
| ECTV | 136 | PTSNSLNALFVMLE <b>LL</b> NYVDYNIIFRRMN                                         | 164 |
|      |     | PTSNSLNALFVMLE <b>+</b> LNyVDYNIIFRRMN                                         |     |
| VACV | 115 | PTSNSLNALFVMLE <b>M</b> LNyVDYNIIFRRMN                                         | 143 |

---

**Orf: D9R<sup>a,b</sup>; epitope: D9R<sub>26-35</sub>**

|      |     |                                                                                |     |
|------|-----|--------------------------------------------------------------------------------|-----|
| ECTV | 1   | MGITMDEEVIFETPRELISIKRIKD <b>IPRSKDT</b> HVF AACITSDGYPLIGARRTSFAFQAIL         | 60  |
|      |     | MGITMDEEVIFETPRELISIKRIKD <b>IPRSKDT</b> HVF AACITSDGYPLIGARRTSFAFQAIL         |     |
| VACV | 1   | MGITMDEEVIFETPRELISIKRIKD <b>IPRSKDT</b> HVF AACITSDGYPLIGARRTSFAFQAIL         | 60  |
| ECTV | 61  | SQQNSDSIFRVSTKLLRFMYYNELREIFRRLRKGSIINNIDPHFEELILLGGKLDKKESEIK                 | 120 |
|      |     | SQQNSDSIFRVSTKLLRFMYYNELREIFRRLRKGSIINNIDPHFEELILLGGKLDKKESEIK                 |     |
| VACV | 61  | SQQNSDSIFRVSTKLLRFMYYNELREIFRRLRKGSIINNIDPHFEELILLGGKLDKKESEIK                 | 120 |
|      |     | <b>89</b> <b>125</b>                                                           |     |
| ECTV | 121 | DCL <b>K</b> RELKEESDERITVKEFGNVILKLTTRDKLFNKVYI <b>G</b> YCMACFINQSLEDLSHTSIY | 180 |
|      |     | DCL <b>+</b> RELKEESDERITVKEFGNVILKLTTRDKLFNKVYI YCMACFINQSLEDLSHTSIY          |     |
| VACV | 121 | DCL <b>R</b> RELKEESDERITVKEFGNVILKLTTRDKLFNKVYI <b>S</b> YCMACFINQSLEDLSHTSIY | 180 |
| ECTV | 181 | NVEIRKIKSLNDCINDDKYEYLSYIYNMLVNSK                                              | 213 |
|      |     | NVEIRKIKSLNDCINDDKYEYLSYIYNMLVNSK                                              |     |
| VACV | 181 | NVEIRKIKSLNDCINDDKYEYLSYIYNMLVNSK                                              | 213 |

---

**Orf: A24R<sup>b</sup>; epitope: A24R<sub>1002-1010</sub>**

|      |     |                                                                        |     |
|------|-----|------------------------------------------------------------------------|-----|
| ECTV | 1   | MKKNTDSEMDQRLGYKFLVDPKAGVFYRPLHFQYVSYSNFILHRLHEILTVKRPLLSFK            | 60  |
|      |     | MKKNTDSEMDQRLGYKFLVDPKAGVFYRPLHFQYVSYSNFILHRLHEILTVKRPLLSFK            |     |
| VACV | 1   | MKKNTDSEMDQRLGYKFLVDPKAGVFYRPLHFQYVSYSNFILHRLHEILTVKRPLLSFK            | 60  |
| ECTV | 61  | NNTERIMIEISNVKVTPPDYSPIIASIKGKSYDALATFTVNIFKEVMTKEGISITKISSY           | 120 |
|      |     | NNTERIMIEISNVKVTPPDYSPIIASIKGKSYDALATFTVNIFKEVMTKEGISITKISSY           |     |
| VACV | 61  | NNTERIMIEISNVKVTPPDYSPIIASIKGKSYDALATFTVNIFKEVMTKEGISITKISSY           | 120 |
| ECTV | 121 | EGKDSHLIKIPLLIIGYGNKNPLDTAKYLVPNVIGGVFINKQSVEKVGINLVEKITTWPKF          | 180 |
|      |     | EGKDSHLIKIPLLIIGYGNKNPLDTAKYLVPNVIGGVFINKQSVEKVGINLVEKITTWPKF          |     |
| VACV | 121 | EGKDSHLIKIPLLIIGYGNKNPLDTAKYLVPNVIGGVFINKQSVEKVGINLVEKITTWPKF          | 180 |
| ECTV | 181 | RVVKPNSFTFSFSSVSPPNVLPTRYRHYKISLDISQLEA <b>S</b> NISSTKTFTITVNIVLLSQYL | 240 |
|      |     | RVVKPNSFTFSFSSVSPPNVLPTRYRHYKISLDISQLEA NISSTKTFTITVNIVLLSQYL          |     |
| VACV | 181 | RVVKPNSFTFSFSSVSPPNVLPTRYRHYKISLDISQLEA <b>L</b> NISSTKTFTITVNIVLLSQYL | 240 |
| ECTV | 241 | SRVSLEFIRRSLSYDMPPEVVYLVNAIIDS AKRITESITDFNIDTYINDLVEAEHIKQKS          | 300 |
|      |     | SRVSLEFIRRSLSYDMPPEVVYLVNAIIDS AKRITESITDFNIDTYINDLVEAEHIKQKS          |     |
| VACV | 241 | SRVSLEFIRRSLSYDMPPEVVYLVNAIIDS AKRITESITDFNIDTYINDLVEAEHIKQKS          | 300 |
| ECTV | 301 | QLTINEFKYEMLHNFLPHMNYTPDQLKGFYMI <b>S</b> LLRKFLYCIYHTSRYPDRDSMVCHRIL  | 360 |
|      |     | QLTINEFKYEMLHNFLPHMNYTPDQLKGFYMI <b>S</b> LLRKFLYCIYHTSRYPDRDSMVCHRIL  |     |
| VACV | 301 | QLTINEFKYEMLHNFLPHMNYTPDQLKGFYMI <b>S</b> LLRKFLYCIYHTSRYPDRDSMVCHRIL  | 360 |

---



|      |      |                                                                 |      |
|------|------|-----------------------------------------------------------------|------|
| ECTV | 361  | TYGKYFETLAHDELENYIGNIRNDIMNNHKNRGTYAVNIHVLTTPGLNHAFFSLLSGKFK    | 420  |
| VACV | 361  | TYGKYFETLAHDELENYIGNIRNDIMNNHKNRGTYAVNIHVLTTPGLNHAFFSLLSGKFK    | 420  |
| ECTV | 421  | KSDGSYRTHPHYSWMQNISIIPRSVGFYDPQVKISKMFSVRKYHPSQYLYFCSSDVPERGP   | 480  |
| VACV | 421  | KSDGSYRTHPHYSWMQNISIIPRSVGFYDPQVKISKMFSVRKYHPSQYLYFCSSDVPERGP   | 480  |
| ECTV | 481  | QVGLVSQLSVLSSITNILTSEYLDLEKKICEYIRSYYKDDISYFETGFPITIENTALVASL   | 540  |
| VACV | 481  | QVGLVSQLSVLSSITNILTSEYLDLEKKICEYIRSYYKDDISYFETGFPITIENTALVASL   | 540  |
| ECTV | 541  | NPNMICDFVTDFFFFRRRKRMGFFGNLEVGITLVRDHMNEIRINIGAGRLVRPFLVVDNGELM | 600  |
| VACV | 541  | NPNMICDFVTDFFFFRRRKRMGFFGNLEVGITLVRDHMNEIRINIGAGRLVRPFLVVDNGELM | 600  |
| ECTV | 601  | MDVCQELESRLDDMTFSDIQKEFPHVIVEMVDIEQFTFSNVCESVQKFRMMSKDERKQYDL   | 660  |
| VACV | 601  | MDVCPELESRLDDMTFSDIQKEFPHVIVEMVDIEQFTFSNVCESVQKFRMMSKDERKQYDL   | 660  |
| ECTV | 661  | CDFPAEFRDGYVASSLVGINHNSGPRAILGCAQAKQAISCLSSDIRNKIDNGIHLMPER     | 720  |
| VACV | 661  | CDFPAEFRDGYVASSLVGINHNSGPRAILGCAQAKQAISCLSSDIRNKIDNGIHLMPER     | 720  |
| ECTV | 721  | PIVISKALETSKIAANCFGQHVTIALMSYKGINQEDGIIKKQFIQRGGLDIVTAKKHQV     | 780  |
| VACV | 721  | PIVISKALETSKIAANCFGQHVTIALMSYKGINQEDGIIKKQFIQRGGLDIVTAKKHQV     | 780  |
| ECTV | 781  | EIPLNFNNKERDRSNAYSKLESNGLVRLNAFLESGDAMARNISSRTLEDDFARDNQISF     | 840  |
| VACV | 781  | EIPLNFNNKERDRSNAYSKLESNGLVRLNAFLESGDAMARNISSRTLEDDFARDNQISF     | 840  |
| ECTV | 841  | DVSEKYTDMYKSRVERVQVELTDKVKVRVLTMKERRPILGDKFTTRTSQKGTVAYIADET    | 900  |
| VACV | 841  | DVSEKYTDMYKSRVERVQVELTDKVKVRVLTMKERRPILGDKFTTRTSQKGTVAYVADET    | 900  |
| ECTV | 901  | ELPYDENGITPDVIINSTSIFSRKTISMLIEVILTAAYSAPYNNNGENRPVCFPSSNET     | 960  |
| VACV | 901  | ELPYDENGITPDVIINSTSIFSRKTISMLIEVILTAAYSAPYNNKGENRPVCFPSSNET     | 960  |
| ECTV | 961  | SIDTYMQFAKQCYEHSNPQLTDEELSDKVFCEKILYDPETDKPYASKVFFGPIYYLRLRH    | 1020 |
| VACV | 961  | SIDTYMQFAKQCYEHSNP+L+D+ELSDK+FCEKILYDPETDKPYASKVFFGPIYYLRLRH    | 1020 |
| ECTV | 1021 | LTQDKATVRCRGKTKLIRQANEGRKRGGGIKFGEMERDCLIAHGAANTITEVLKDSEED     | 1080 |
| VACV | 1021 | LTQDKATVRCRGKTKLIRQANEGRKRGGGIKFGEMERDCLIAHGAANTITEVLKDSEED     | 1080 |
| ECTV | 1081 | YQDVYICENCEDIAAQIKGINTCLRCSKLNLSPLLTKIDTTHVSKVFLTQMNARGVKVKL    | 1140 |
| VACV | 1081 | YQDVY+ENCENCEDIAAQIKGINTCLRCSKLNLSPLLTKIDTTHVSKVFLTQMNARGVKVKL  | 1140 |

---

|      |      |                                  |      |
|------|------|----------------------------------|------|
| ECTV | 1141 | DFERRPPSFYK <b>Q</b> LDKVDLKPSFL | 1163 |
|      |      | DFERRPPSFYK LDKVDLKPSFL          |      |
| VACV | 1141 | DFERRPPSFYK <b>P</b> LDKVDLKPSFL | 1163 |

---

<sup>a</sup>VACV txid: 10249

<sup>b</sup>ECTV txid: 12643

<sup>c</sup>VACV txid: 10245

Blue bold, variation outside the epitope; red bold, amino acid sequence of the epitope

---

**TABLE S3. List of Antibodies**

| <b>Antigen</b>   | <b>Fluorochrome</b> | <b>Clone</b> | <b>Source</b>     | <b>Catalogue number</b> |
|------------------|---------------------|--------------|-------------------|-------------------------|
| B220             | FITC                | RA3-6B2      | BD Biosciences    | 553088                  |
| B220             | PerCP-Cy5.5         | RA3-6B2      | Biolegend         | 103236                  |
| B220             | APC-Cy7             | RA3-6B2      | BD Biosciences    | 552094                  |
| CD69             | APC                 | H1.2F3       | Biolegend         | 104514                  |
| CD8a             | FITC                | 53-6.7       | BD Biosciences    | 553031                  |
| CD8a             | PerCP-Cy5.          | 53-6.7       | BD Biosciences    | 551162                  |
| CD45.2           | FITC                | 104          | Biolegend         | 109806                  |
| CD45.2           | APC                 | 104          | Tonbo Biosciences | 20-0454-U100            |
| CXCR3            | APC                 | CXCR3-173    | BD Biosciences    | 562266                  |
| CD62L            | PE                  | MEL-14       | BD Biosciences    | 553151                  |
| KLRG1            | APC                 | 2F1/KLRG1    | Biolegend         | 138412                  |
| CD49a            | PE                  | Ha31/8       | BD Biosciences    | 562115                  |
| CCR8             | APC                 | SA214G2      | Biolegend         | 150309                  |
| CXCR6            | PE                  | SA051D1      | Biolegend         | 151103                  |
| CD103            | PE                  | 2E7          | Biolegend         | 121405                  |
| Ghost Violet 510 | V510                | na           | Tonbo Biosciences | 13-0870-T100            |
| pB7.2 tetramer   | PE                  | na           | in house          | na                      |
| pB7.2 tetramer   | APC                 | na           | in house          | na                      |
| pB7.2 tetramer   | BV421               | na           | in house          | na                      |
| pB7.2 tetramer   | PE-Cy7              | na           | in house          | na                      |
| pB7.2 tetramer   | APC-Cy7             | na           | in house          | na                      |

na, not applicable

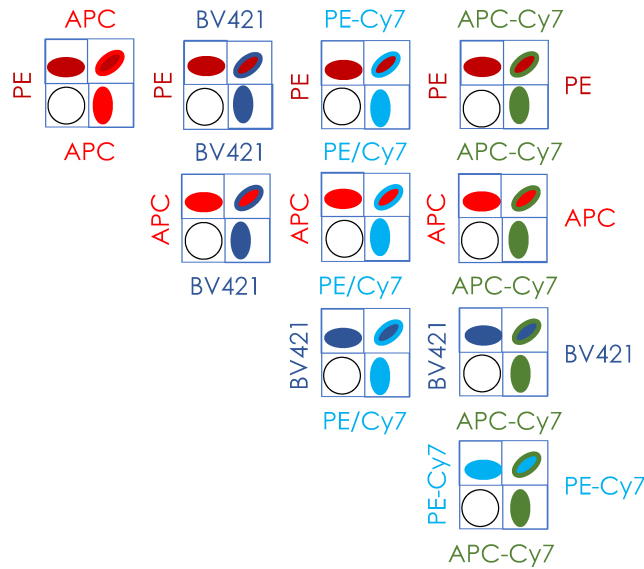

**Figure S1: A schematic rendition of binary encoding of T cell epitope specificity.** pMHC monomers are made to tetramers by reacting the biotinylated monomer of a single antigen specificity with two distinct fluorophore-conjugated streptavidin in two separate tubes. When a pMHC monomer of a single specificity is individually tetramerised with five different fluorophore-conjugated streptavidin molecules, and two tetramers made of two different fluorophore-conjugated streptavidin molecules mixed –and, thereby, binary encoded– one will obtain ten unique combinations as shown in the schematic. For a real example, see Figure 1A. In a variation of this binary encoding of a pMHC monomer with a single specificity, monomers of ten different specificities can be binary encoded with two unique combinations of fluorophores just with 5 different fluorophore-conjugated streptavidin molecules. For a real example, see Figure 1B. refer to refs.<sup>3,4</sup> for detailed description and protocols.

## Panel 1

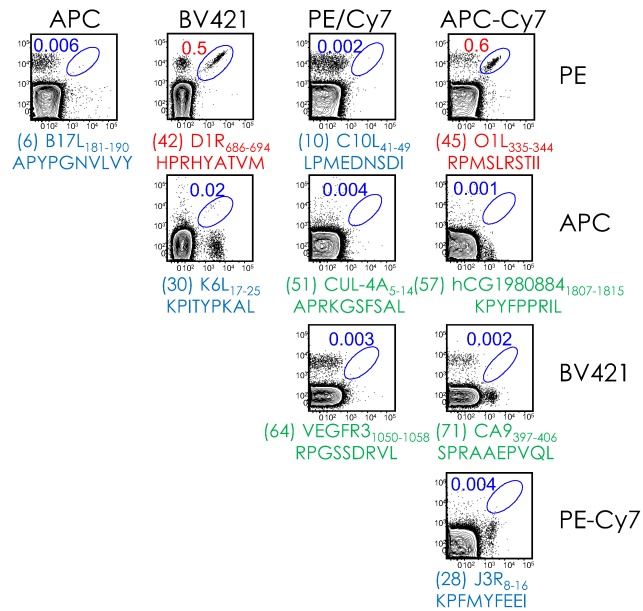

## Panel 2

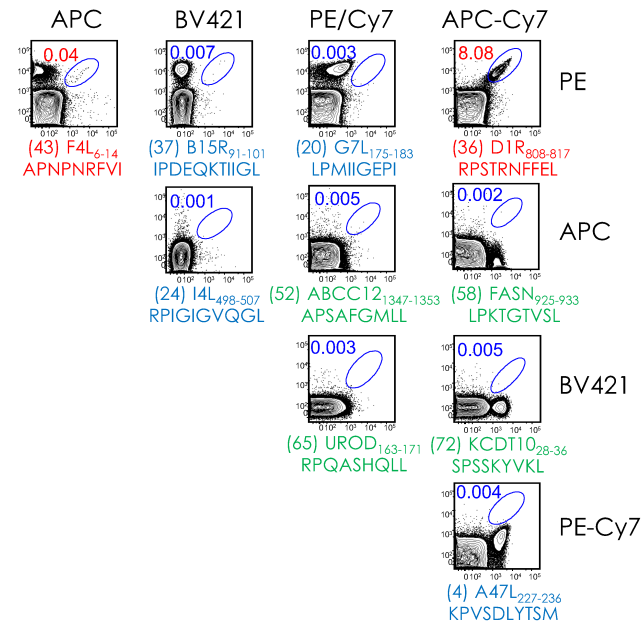

**Figure S2, Panels 1&2: Tracking VACV-reactive CD8<sup>+</sup> T cell responses in B7.2<sup>tg</sup> mice.** As in Figure 2, B7<sup>tg</sup> mice were inoculated i.n. with sublethal dose of ECTV, and after 4 weeks challenged i.n. with a lethal dose of the same virus. See Materials & Methods. Spleens were harvested from mock (n=2) and ECTV (n=8) inoculated mice after 8–10 days post inoculation. CD8<sup>+</sup> T cells were identified as CD8<sup>+</sup> splenocytes after gating out dead cells and B220<sup>+</sup> cells. Peptide-specific CD8<sup>+</sup> T cells were identified using dual fluorochrome-labelled pB7.2 tetramers and binary encoding strategy as schematised in Figure S2. Red, positive VACV pB7.2 tetramer staining; blue, no staining with VACV pB7.2 tetramer; green, self p/B7.2 tetramers. *Note that Panel 3 is shown in Figure 1B.*

## Panel 4

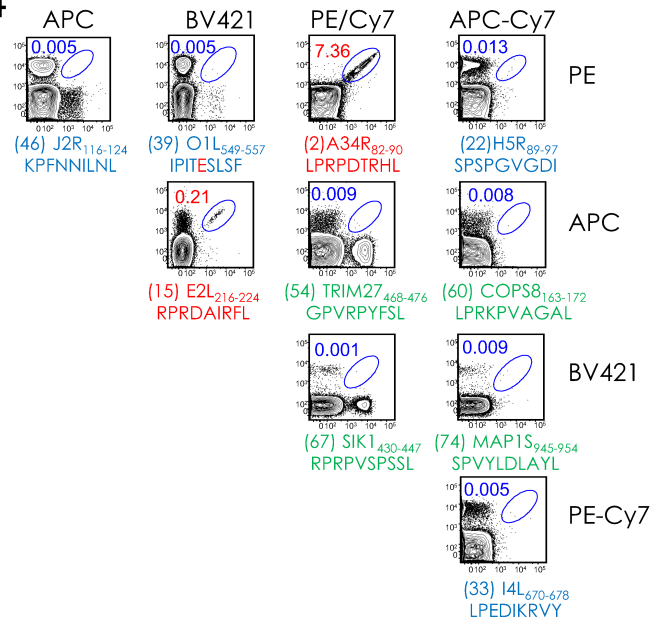

## Panel 5

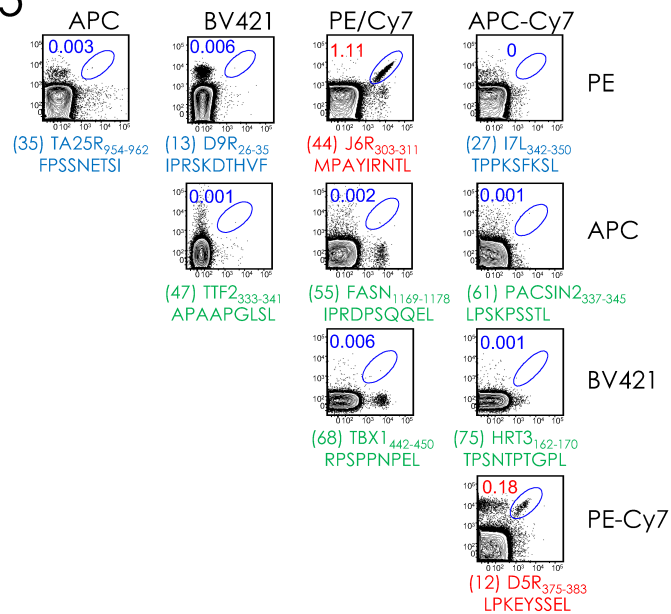

**Figure S2 continued, Panels 4&5: Tracking ECTV-reactive CD8<sup>+</sup> T cell responses in B7.2<sup>tg</sup> mice.** As in Figure 2, B7<sup>tg</sup> mice were inoculated i.n. with sublethal dose of ECTV, and after 4 weeks challenged i.n. with a lethal dose of the same virus. See Materials & Methods. Splensens were harvested from mock (n=2) and ECTV (n=8) inoculated mice after 8–10 days post inoculation. CD8<sup>+</sup> T cells were identified as CD8<sup>+</sup> splenocytes after gating out dead cells and B220<sup>+</sup> cells. Peptide-specific CD8<sup>+</sup> T cells were identified using dual fluorochrome-labelled pB7.2 tetramers and binary encoding strategy as schematised in Figure S2. Red, positive VACV pB7.2 tetramer staining; blue, no staining with VACV pB7.2 tetramer; self p/B7.2 tetramers. Note that Panel 3 is shown in Figure 1B.

## Panel 6

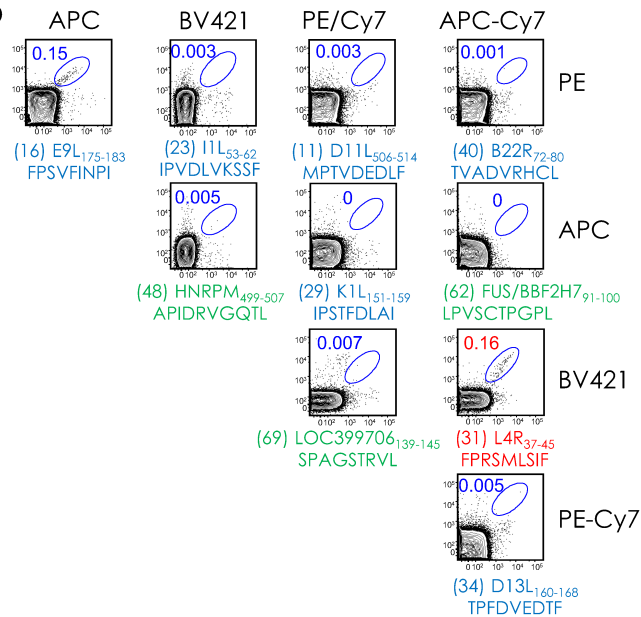

## Panel 7

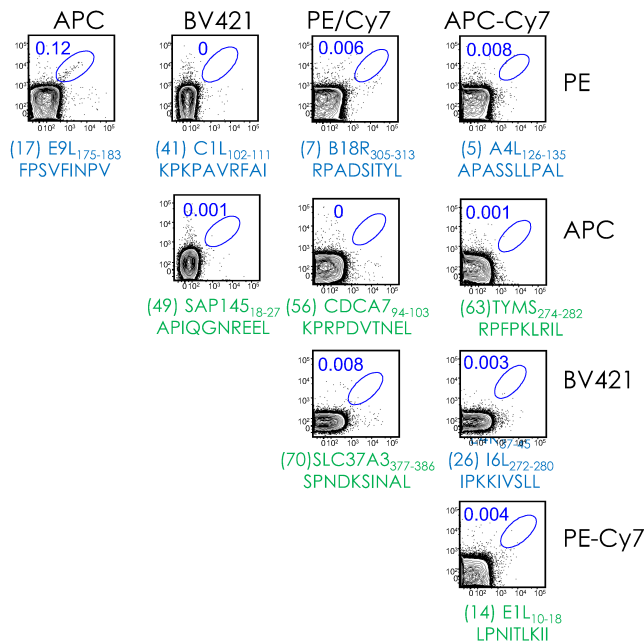

**Figure S2 continued, Panels 6&7: Tracking ECTV-reactive CD8<sup>+</sup> T cell responses in B7.2<sup>tg</sup> mice.** As in Figure 2, B7<sup>tg</sup> mice were inoculated i.n. with sublethal dose of ECTV, and after 4 weeks challenged i.n. with a lethal dose of the same virus. See Materials & Methods. Spleens were harvested from mock (n=2) and ECTV (n=8) inoculated mice after 8–10 days post inoculation. CD8<sup>+</sup> T cells were identified as CD8<sup>+</sup> splenocytes after gating out dead cells and B220<sup>+</sup> cells. Peptide-specific CD8<sup>+</sup> T cells were identified using dual fluorochrome-labelled pB7.2 tetramers and binary encoding strategy as schematised in Figure S2. Red, positive VACV pB7.2 tetramer staining; blue, no staining with VACV pB7.2 tetramer; green, self p/B7.2 tetramers.

## Panel 8

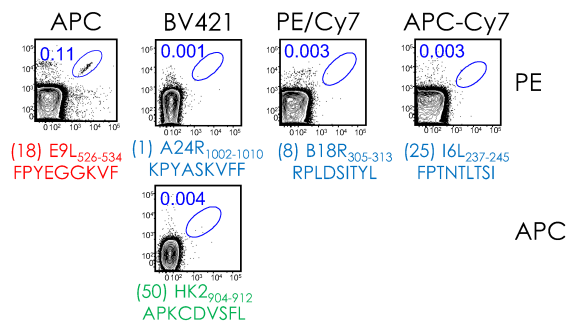

**Figure S2 continued, Panel 8: Tracking ECTV-reactive CD8<sup>+</sup> T cell responses in B7.2<sup>tg</sup> mice.** As in Figure 2, B7<sup>tg</sup> mice were inoculated i.n. with sublethal dose of ECTV, and after 4 weeks challenged i.n. with a lethal dose of the same virus. See Materials & Methods. Spleens were harvested from mock (n=2) and ECTV (n=8) inoculated mice after 8–10 days post inoculation. CD8<sup>+</sup> T cells were identified as CD8<sup>+</sup> splenocytes after gating out dead cells and B220<sup>+</sup> cells. Peptide-specific CD8<sup>+</sup> T cells were identified using dual fluorochrome-labelled pB7.2 tetramers and binary encoding strategy as schematised in Figure S2. Red, positive VACV pB7.2 tetramer staining; blue, no staining with VACV pB7.2 tetramer; green, self p/B7.2 tetramers.



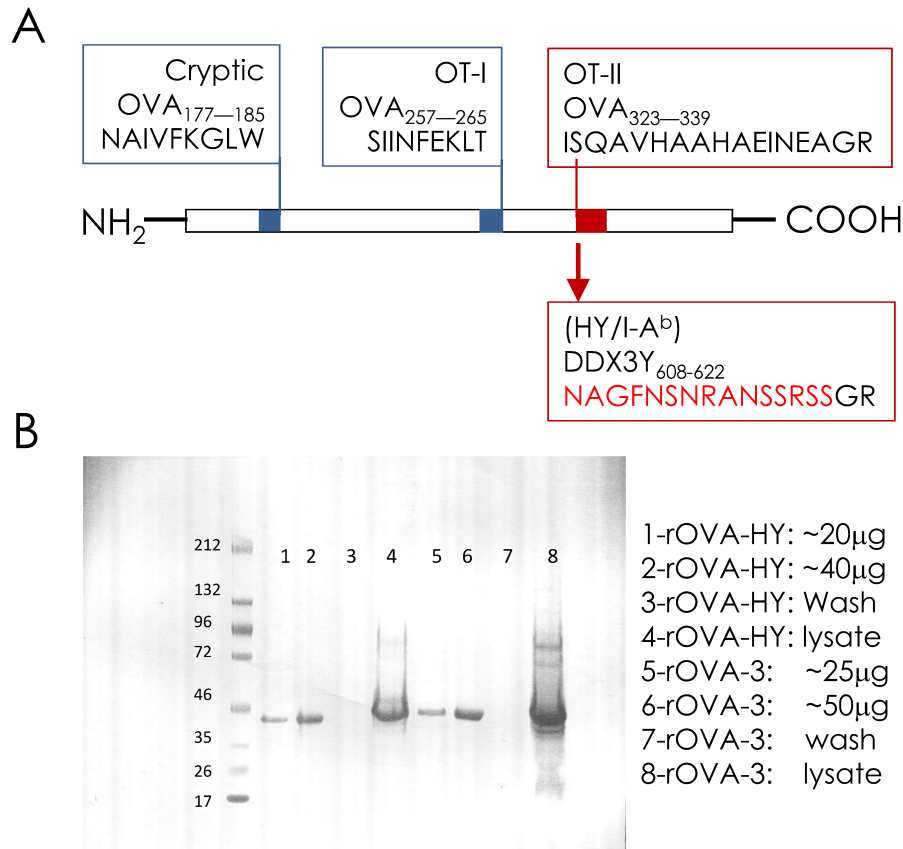

**Figure S3: Design of rOVA-HY protein, and the expression and purification of rOVA-HY and rOVA-3 proteins.** (A) Schematic rendition of the rOVA-HY construct in which the OT-II epitope was replaced with the H-2I-A<sup>b</sup>-restricted HY epitope (NAGFNSNRANSSRSS) recognised by CD4<sup>+</sup> T cells elicited by C57BL/6 female mice immunised with C57BL/6 male splenocytes.<sup>5,6</sup> Original cryptic, and OT-I epitopes were intact. rOVA-HY containing a C-terminal hexa-histidine tag was constructed by gene synthesis and cloned into pET24a for expression in *E. coli*. (B) Representative SDS/4–12%-PAGE image showing expression of indicated rOVA protein before and after purification over metal affinity column (see Materials and Methods for details).

## LITERATURE CITED

1. Gilchuk, P. *et al.* Discovering naturally processed antigenic determinants that confer protective T cell immunity. *The Journal of clinical investigation* **123**, 1976-1987 (2013).
2. Spencer, C.T. *et al.* Viral infection causes a shift in the self peptide repertoire presented by human MHC class I molecules. *Proteomics Clin Appl* **9**, 1035-1052 (2015).
3. Hadrup, S.R. *et al.* Parallel detection of antigen-specific T-cell responses by multidimensional encoding of MHC multimers. *Nature methods* **6**, 520-526 (2009).
4. Andersen, R.S. *et al.* Parallel detection of antigen-specific T cell responses by combinatorial encoding of MHC multimers. *Nature protocols* **7**, 891-902 (2012).
5. Dragovic, S.M. *et al.* Proteasomes, TAP, and endoplasmic reticulum-associated aminopeptidase associated with antigen processing control CD4+ Th cell responses by regulating indirect presentation of MHC class II-restricted cytoplasmic antigens. *J Immunol* **186**, 6683-6692 (2011).
6. Scott, D. *et al.* Dendritic cells permit identification of genes encoding MHC class II-restricted epitopes of transplantation antigens. *Immunity* **12**, 711-720 (2000).
